# Supplementary material for: RhoGDI2 up-regulates P-glycoprotein expression via Rac1 in gastric cancer cells
Source: PubMed Central journal article supplement (PMC4404694; doi:10.1186/s12935-015-0190-4), 2015-04-15
Supplement: 12935_2015_190_MOESM1_ESM.pdf [file 12935_2015_190_MOESM1_ESM.pdf]

A

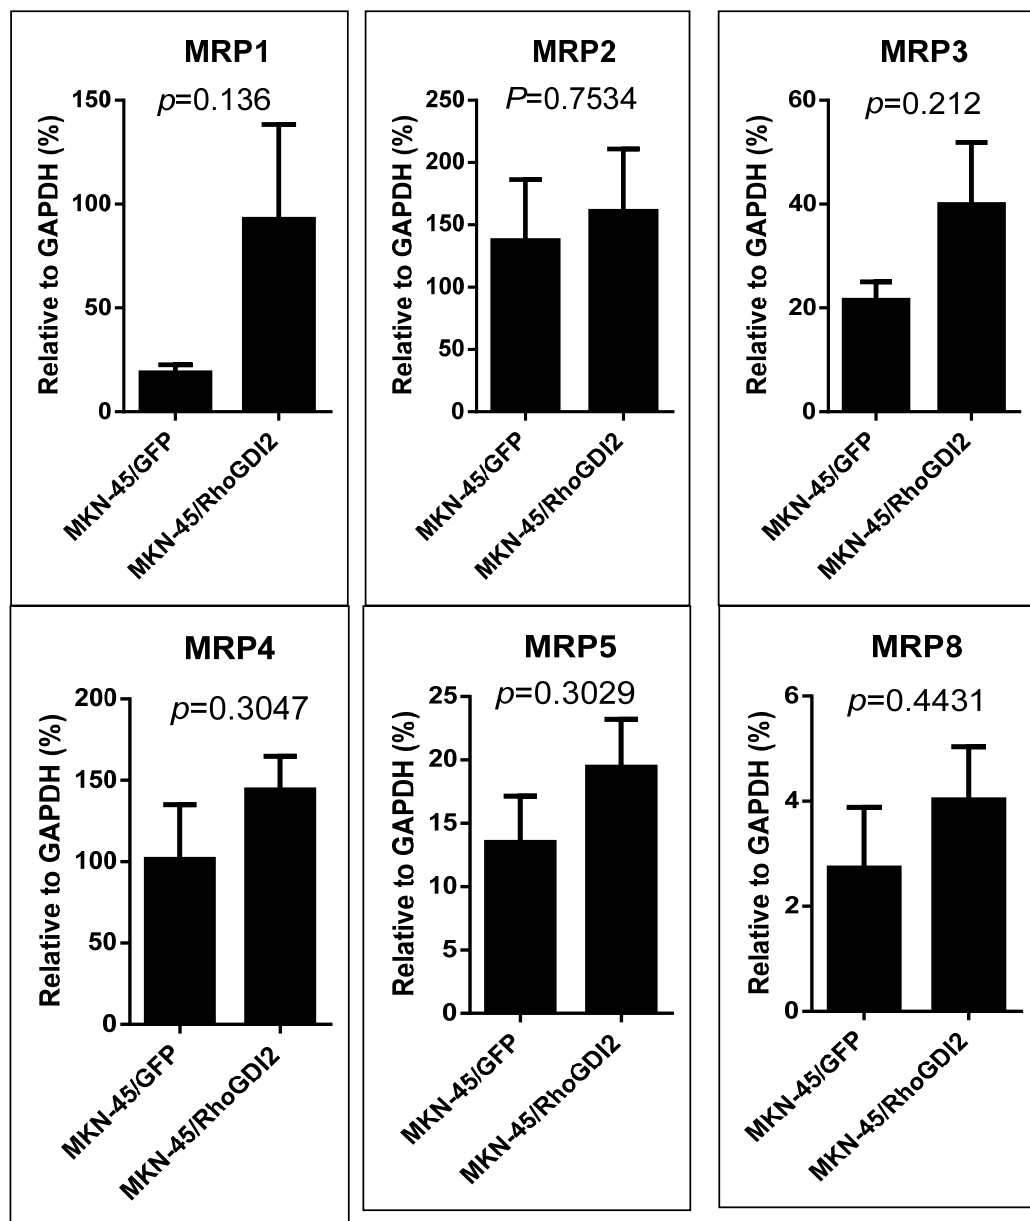

B

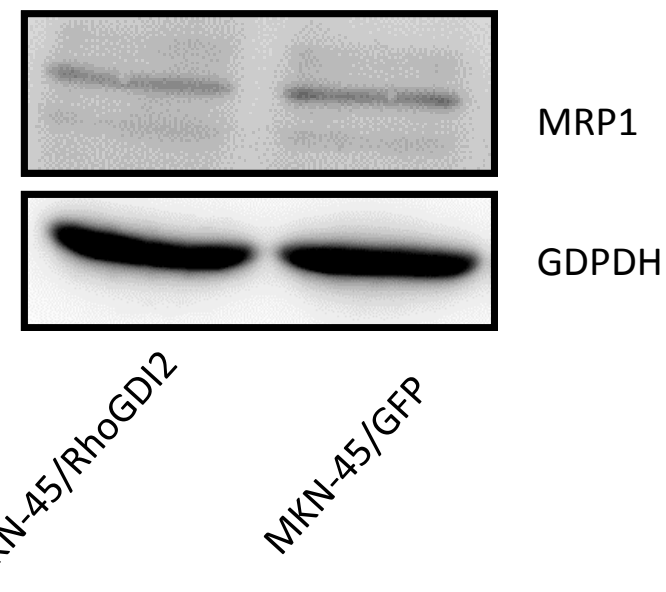

Supplemental Figure 1
